# Supplementary material for: RETRACTED: Insight into the Potential Antioxidant and Antidiabetic Activities of Scrolled Kaolinite Single Sheet (KNs) and Its Composite with ZnO Nanoparticles: Synergetic Studies
Source: MDPI journal article supplement (doi:10.3390/min13040567), 2023-04-18
Supplement: s1 [file s1]

Archive with 1 entries (1 files):
- minerals-2250043-supplementary.pdf
