# Supplementary material for: RETRACTED: Insight into the Potential Antioxidant and Antidiabetic Activities of Scrolled Kaolinite Single Sheet (KNs) and Its Composite with ZnO Nanoparticles: Synergetic Studies
Source: MDPI journal article supplement (doi:10.3390/min13040567), 2023-04-18
Supplement: s1 [file s1 › minerals-2250043-supplementary.pdf]

# Insight into the Potential Antioxidant and Antidiabetic Activities of Scrolled Kaolinite Single Sheet (KNs) and Its Composite with ZnO Nanoparticles: Synergetic Studies

Hassan Ahmed Rudayni <sup>1</sup>, Malak Aladwani <sup>1</sup>, Lina M. Alneghery <sup>1</sup>, Ahmed A. Allam <sup>2</sup>,  
Mostafa R. Abukhadra <sup>3,4,\*</sup> and Stefano Bellucci <sup>5,\*</sup>

<sup>1</sup> Department of Biology, College of Science, Imam Muhammad bin Saud Islamic University, Riyadh 11623, Saudi Arabia

<sup>2</sup> Zoology Department, Faculty of Science, Beni-Suef University, Beni-Suef 65214, Egypt

<sup>3</sup> Materials Technologies and Their Applications Lab, Geology Department, Faculty of Science, Beni-Suef University, Beni-Suef 65214, Egypt

<sup>4</sup> Geology Department, Faculty of Science, Beni-Suef University, Beni-Suef 65214, Egypt

<sup>5</sup> INFN, Laboratori Nazionali Di Frascati, E. Fermi 54, 00044 Frascati, Italy

\* Correspondence: abukhadra89@science.bsu.edu.eg (M.R.A.); bellucci@lnf.infn.it (S.B.)

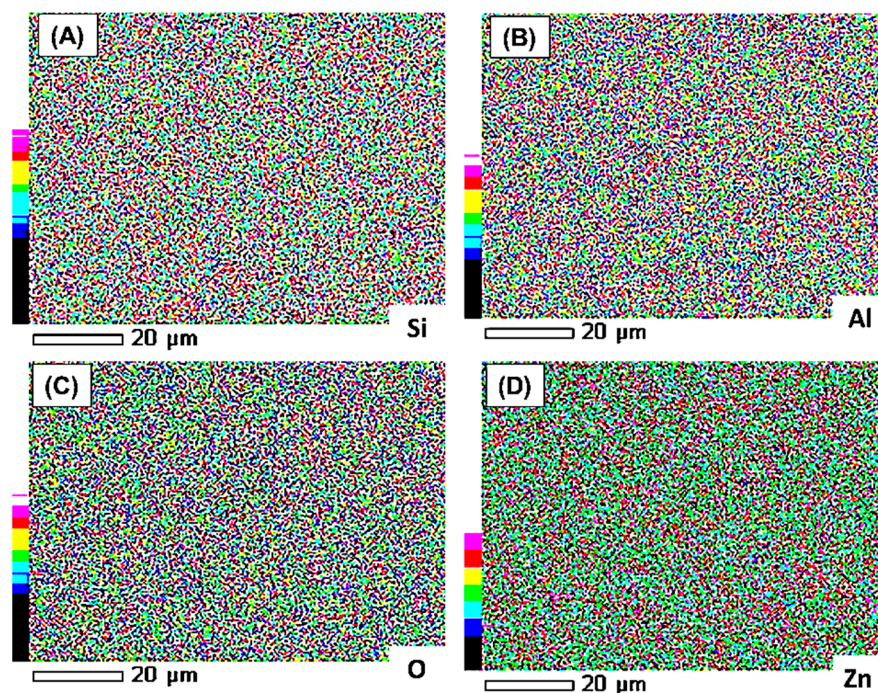

Figure S1. EDX mapping of synthetic ZnO/KNs structure.

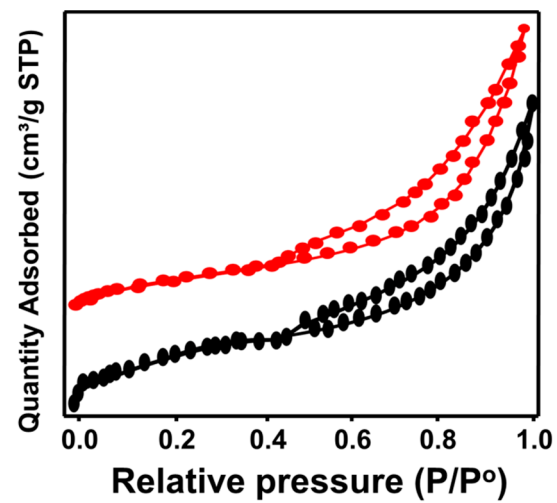

Figure S2. N<sub>2</sub> adsorption/desorption isotherm curves of KNs and ZnO/KNs structure.
